# Supplementary material for: Molecular profiling of single circulating tumor cells with diagnostic intention
Source: PubMed Central journal article supplement (PMC4237466; doi:10.15252/emmm.201404033), 2014-10-30

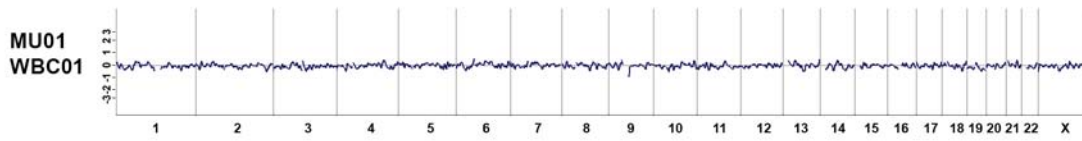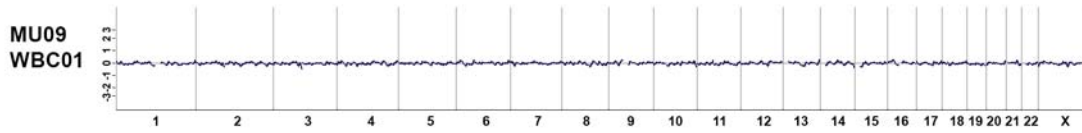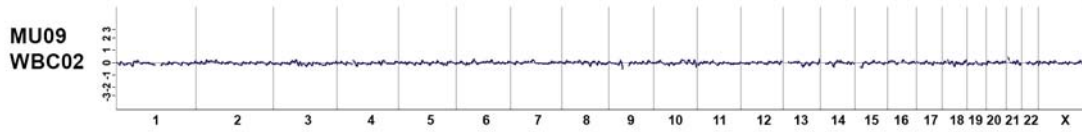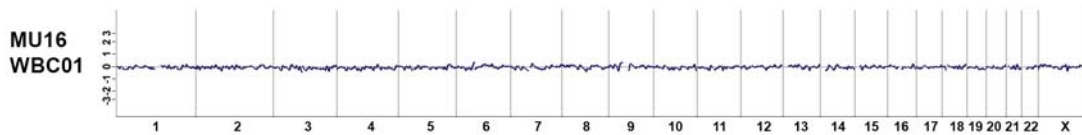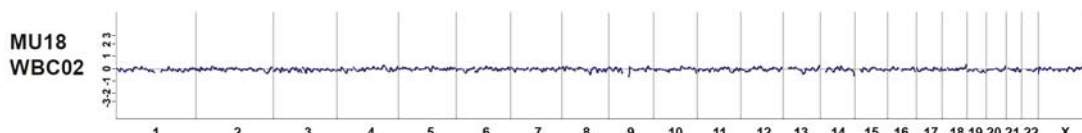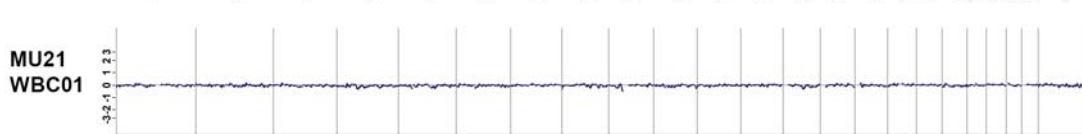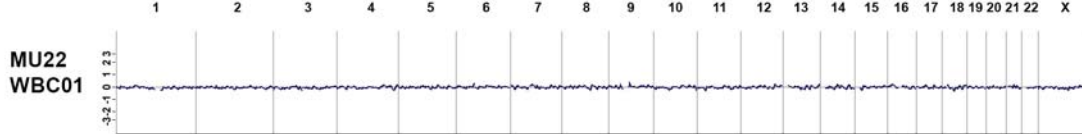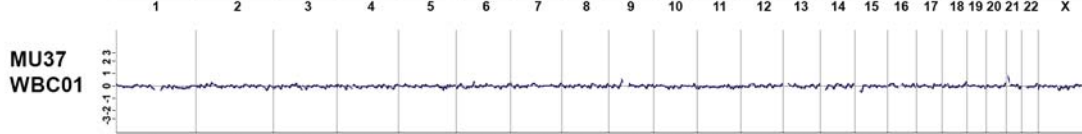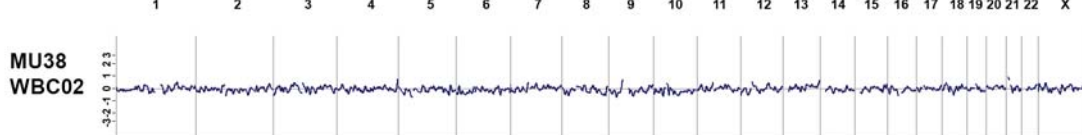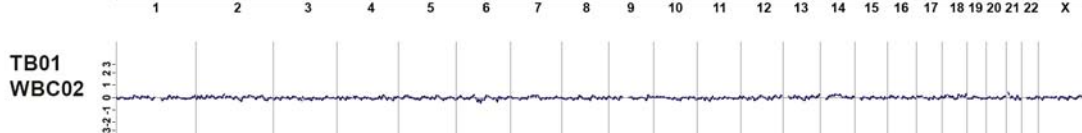

Supplement: emmm0006-1371-sd3.pdf [file emmm0006-1371-sd3.pdf]
