# Supplementary material for: Molecular profiling of single circulating tumor cells with diagnostic intention
Source: PubMed Central journal article supplement (PMC4237466; doi:10.15252/emmm.201404033), 2014-10-30
Supplement: emmm0006-1371-sd4.pdf [file emmm0006-1371-sd4.pdf]

# gDNA

# unfixed cells - manual cell isolation

# fixed cells - CellSearch/DEPArray workflow

Cell #1

Cell #2

Cell #3

Cell Pool

Cell #1

Cell #2

Cell #3

Cell Pool

DLRS 0.17

DLRS 0.77

DLRS 0.76

DLRS 0.66

DLRS 0.91

DLRS 1.11

DLRS 1.10

DLRS 1.15

DLRS 1.21

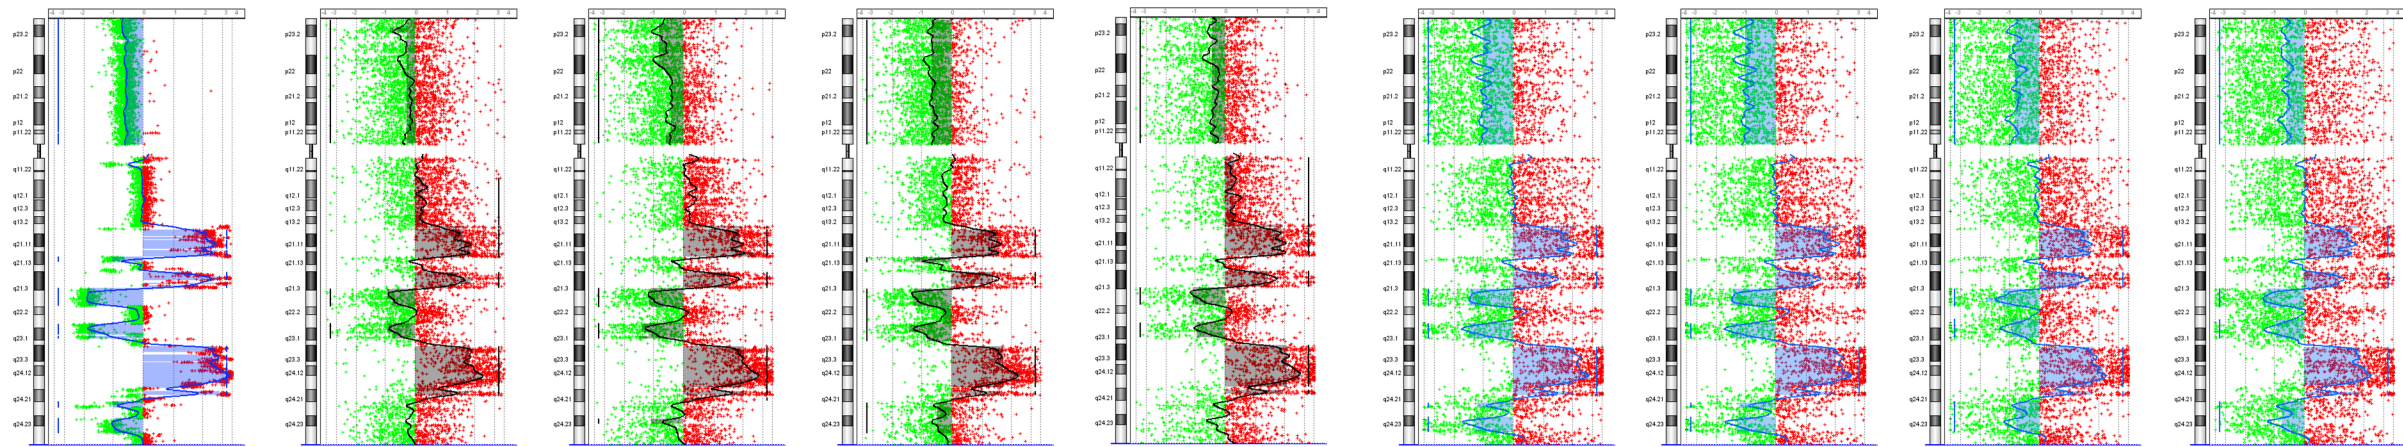

Chromosome 8 profiles of SKBR3 breast cancer cell line

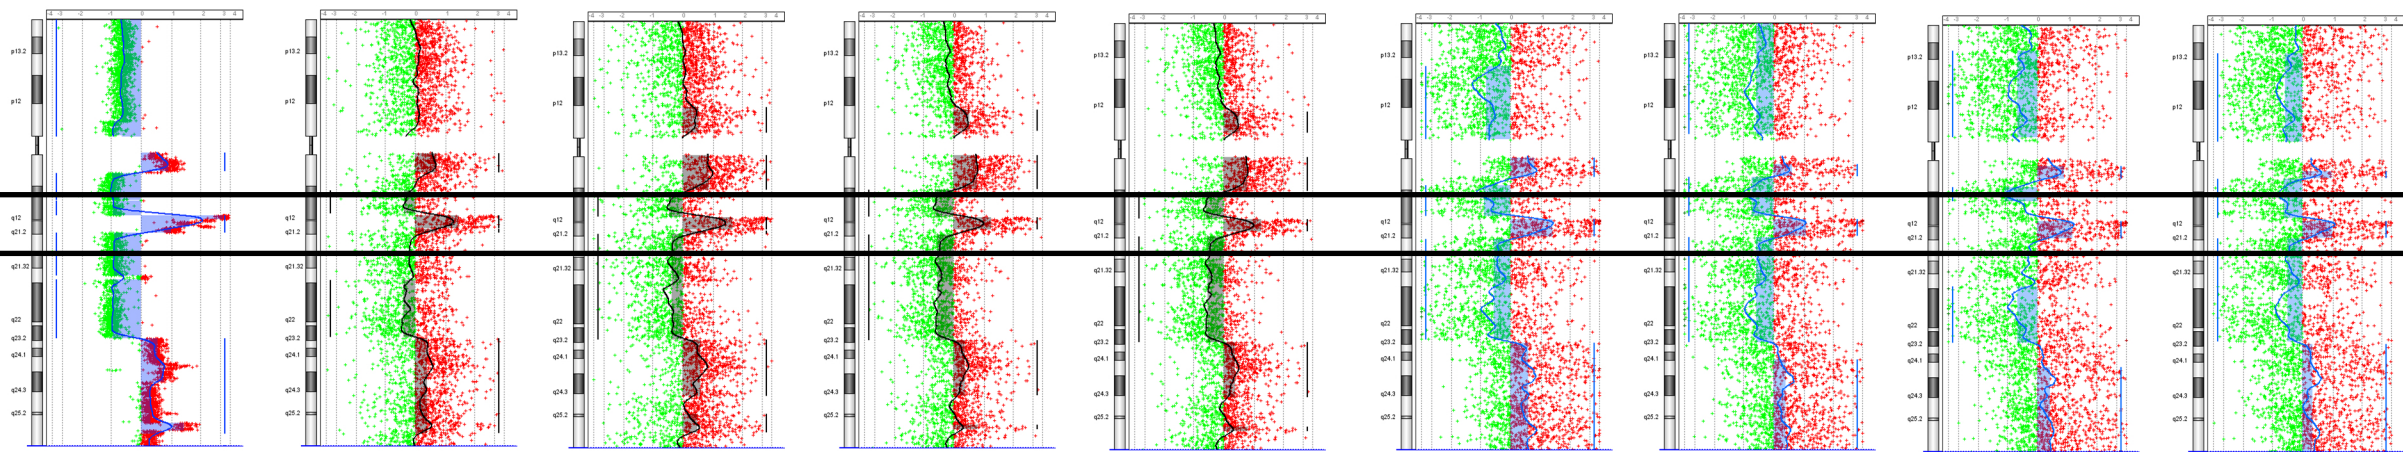

Chromosome 17 profiles of SKBR3 breast cancer cell line (*ERBB2* region highlighted)
