# Supplementary material for: Molecular profiling of single circulating tumor cells with diagnostic intention
Source: PubMed Central journal article supplement (PMC4237466; doi:10.15252/emmm.201404033), 2014-10-30
Supplement: emmm0006-1371-sd7.pdf [file emmm0006-1371-sd7.pdf]

**Table S2. Primer and amplicon information for the QC1 and QC2 assays.**

| Oligonucleotide ID | Chromosomal location | Length of Mse fragment | Sequence                | Annealing temperature | Length of PCR fragment | Included in assay |
|--------------------|----------------------|------------------------|-------------------------|-----------------------|------------------------|-------------------|
| BCR-TT forward     | 22q                  | 1936 bp                | CGTGGACAACACTACGGAGTTG  | 61°C                  | 323 bp                 |                   |
| BCR-TT reverse     |                      |                        | TCAGCCTCAGGACTCTTGTG    |                       |                        |                   |
| D5S2117 forward    | 5q                   | 1376 bp                | CCAGGTGAGAACCTAGTCAG    | 58°C                  | 140 bp*                | QC1, QC2          |
| D5S2117 reverse    |                      |                        | ACTGAGTCCTCCAACCATGG    |                       |                        |                   |
| TP53 Ex2/3 forward | 17p                  | 1374 bp                | GAAGCGTCTCATGCTGGATC    | 58°C                  | 301 bp                 | QC1, QC2          |
| TP53 Ex2/3 reverse |                      |                        | CAGCCCAACCCTTGTCTTA     |                       |                        |                   |
| CK19 forward       | 6q                   | 1146 bp                | GAAGATCCGCGACTGGTAC     | 58°C                  | 614 bp                 | QC1, QC2          |
| CK19 reverse       |                      |                        | TTCATGCTCAGCTGTGACTG    |                       |                        |                   |
| IGF2R forward      | 6q                   | 647 bp                 | GCCACTGTCTGAAGTCTGCA    | 58°C                  | 217 bp                 |                   |
| IGF2R reverse      |                      |                        | GGATCTTGGTACCACTCATG    |                       |                        |                   |
| RUFY2 forward      | 10q                  | 458 bp                 | GTTGAGGGCTTCATCAACACCCA | 64°C                  | 104 bp                 |                   |
| RUFY2 reverse      |                      |                        | CAGCTAGGAACTCCAGGAATCA  |                       |                        |                   |
| SMYD1 forward      | 2p                   | 287 bp                 | GGGTGACCTGCTTGACATC     | 55°C                  | 163 bp                 |                   |
| SMYD1 reverse      |                      |                        | CTTTTCCCTGAAGGTCTTAG    |                       |                        |                   |
| PHAGTR2 forward    | 6q                   | 239 bp                 | ACTGAACAGAGCAGGTCTAC    | 58°C                  | 205 bp                 |                   |
| PHAGTR2 reverse    |                      |                        | TGTGAGAAAGACTTGGAGTT    |                       |                        |                   |
| KRAS forward       | 12p                  | 192 bp                 | ATAAGGCCTGCTGAAAATGAC   | 58°C                  | 91 bp                  | QC2               |
| KRAS reverse       |                      |                        | CTGAATTAGCTGTATCGTCAAGG |                       |                        |                   |

\* microsatellite marker with varying sequence length; homozygous samples show one band, heterozygous samples two bands in the size range 108-166 bp
