# Supplementary material for: Molecular profiling of single circulating tumor cells with diagnostic intention
Source: PubMed Central journal article supplement (PMC4237466; doi:10.15252/emmm.201404033), 2014-10-30
Supplement: emmm0006-1371-sd9.pdf [file emmm0006-1371-sd9.pdf]

**Table S3. QC-1 assay: Detection of long Mse-fragments after *Ampli1*<sup>TM</sup> WGA**

|                                             | Detected sequences by QC1-assay (3 markers) |             |            |            |             |
|---------------------------------------------|---------------------------------------------|-------------|------------|------------|-------------|
|                                             | n                                           | 3/3         | 2/3        | 1/3        | 0/3         |
| <b>Single WBCs (unfixed)</b>                | 88                                          | 80 (90.9%)  | 3 (3.41%)  | 0          | 5 (5.68%)   |
| <b>Single WBCs (CellSearch<sup>®</sup>)</b> | 189                                         | 73 (38.6%)  | 51 (27.0%) | 20 (10.6%) | 45 (23.8%)  |
| <b>Single CTCs (CellSearch<sup>®</sup>)</b> | 510                                         | 102 (20.0%) | 89 (17.5%) | 55 (10.8%) | 264 (51.8%) |
