# Supplementary material for: Molecular profiling of single circulating tumor cells with diagnostic intention
Source: PubMed Central journal article supplement (PMC4237466; doi:10.15252/emmm.201404033), 2014-10-30
Supplement: emmm0006-1371-sd10.pdf [file emmm0006-1371-sd10.pdf]

**Table S5. Genomic integrity index predicts downstream molecular analyses in single CTCs and WBCs.**

| Sample      | Molecular assay        | n   | GII 0*       | GII 1*        | GII 2*        | GII 3*        | GII 4*        | P Value <sup>§</sup> |
|-------------|------------------------|-----|--------------|---------------|---------------|---------------|---------------|----------------------|
| <b>CTCs</b> | <b>PIK3CA Exon 9</b>   | 261 | 5/20 (25.0%) | 12/20 (60.0%) | 36/48 (75.0%) | 67/77 (87.0%) | 93/96 (96.9%) | <0.00001             |
|             | <b>PIK3CA Exon 20</b>  | 261 | 7/20 (35.0%) | 16/20 (80.0%) | 41/48 (85.4%) | 73/77 (94.8%) | 93/96 (96.9%) | <0.00001             |
|             | <b>PIK3CA complete</b> | 261 | 3/20 (15.0%) | 11/20 (55.0%) | 33/48 (68.8%) | 64/77 (83.1%) | 91/96 (94.8%) | <0.00001             |
|             | <b>ERBB2 qPCR</b>      | 246 | 3/11 (27.3%) | 8/16 (50.0%)  | 28/47 (59.6%) | 65/77 (84.4%) | 88/95 (92.6%) | <0.00001             |
|             | <b>aCGH</b>            | 40  | not assessed | not assessed  | 3/4 (75.0%)   | 6/8 (75.0%)   | 28/28 (100%)  | 0.023                |
| <b>WBCs</b> | <b>PIK3CA Exon 9</b>   | 122 | 2/3 (66.7%)  | 2/5 (40.0%)   | 12/14 (85.7%) | 35/40 (87.5%) | 53/60 (88.3%) | 0.048                |
|             | <b>PIK3CA Exon 20</b>  | 122 | 1/3 (33.3%)  | 2/5 (40.0%)   | 14/14 (100%)  | 36/40 (90.0%) | 56/60 (93.3%) | 0.0003               |
|             | <b>PIK3CA complete</b> | 122 | 1/3 (33.3%)  | 1/5 (20.0%)   | 12/14 (85.7%) | 33/40 (82.5%) | 50/60 (83.3%) | 0.0004               |
|             | <b>ERBB2 qPCR</b>      | 105 | 0/1          | 0/2           | 13/14 (92.9%) | 30/35 (85.7%) | 48/53 (90.6%) | 0.00036              |
|             | <b>aCGH</b>            | 10  | not assessed | not assessed  | 1/1 (100.0%)  | 1/1 (100.0%)  | 8/8 (100%)    | not assessed         |

\* GII = Genome integrity index; GII 0: no fragment detected by QC2-assay; GII 1: QC2-assay negative for the three long markers, but KRAS fragment detected; GII 2: 1/3 long MseI fragments of QC2-assay detected; GII 3: 2/3 long MseI fragments of QC2-assay detected; GII 4: 3/3 long MseI fragments of QC2-assay detected

§ Tested by Chi-square
