# Supplementary material for: Molecular profiling of single circulating tumor cells with diagnostic intention
Source: PubMed Central journal article supplement (PMC4237466; doi:10.15252/emmm.201404033), 2014-10-30
Supplement: emmm0006-1371-sd11.pdf [file emmm0006-1371-sd11.pdf]

**Table S6. PIK3CA mutations in breast cancer CTCs**

| patient ID <sup>*</sup> | Stage     | detected mutation | number of                 | number of   | mutational status |
|-------------------------|-----------|-------------------|---------------------------|-------------|-------------------|
|                         |           |                   | wildtype CTC <sup>§</sup> | mutated CTC | CTC pool          |
| MU01                    | Stage IIA | E542K, exon 9     | 1                         | 1           | not tested        |
| MU09                    | Stage IV  | H1047R, exon 20   | 2                         | 4           | not tested        |
| MU14                    | Stage IV  | H1047L, exon 20   | 0                         | 4           | not tested        |
| MU16                    | Stage IV  | H1047R, exon 20   | 1                         | 1           | not tested        |
| MU18                    | Stage IV  | H1047R, exon 20   | 3                         | 1           | E545K, exon 9     |
| MU20                    | Stage IV  | E545K, exon 9     | 2                         | 2           | E545K, exon 9     |
| MU22                    | unknown   | H1047R, exon 20   | 0                         | 10          | H1047R, exon 20   |
| MU23                    | Stage IV  | E545K, exon 9     | 1                         | 2           | not tested        |
| MU27                    | Stage IV  | M1043V, exon 20   | 2                         | 8           | M1043V, exon 20   |
| MU31 <sup>¶</sup>       | Stage IV  | H1047R, exon 20   | 0                         | 1           | not tested        |
| MU35                    | Stage IV  | E542K, exon 9     | 0                         | 5           | not tested        |
| MU37                    | Stage IV  | E542K, exon 9     | 2                         | 2           | not tested        |
| MU38                    | Stage IV  | E542K, exon 9     | 1                         | 8           | E542K, exon 9     |
| TB07                    | Stage IV  | E545K, exon 9     | 0                         | 1           | not tested        |
| IB14                    | Stage IV  | F1039S, exon 20   | 6                         | 1           | Wildtype          |
| IB25                    | Stage IV  | W1051*, exon 20   | 37                        | 1           | Wildtype          |
| IB26                    | Stage IV  | H1047R, exon 20   | 0                         | 5           | H1047R, exon 20   |

<sup>\*</sup> patient ID indicates the clinical sample that acquired the sample (MU = Munich, TB = Tuebingen, IB = Milano)

<sup>§</sup> confirmed wildtype status for the mutated exon of the patient (exon 9 or 20, respectively), cells with dropout for the exon of interest were not listed. Importantly, all three single CTC of patient MU18 labeled wildtype have confirmed wildtype status for both exon 9 and 20.

<sup>¶</sup> patient MU31 is not included among the 16 patients mentioned in the main text, as we were not able to obtain sequence data for both *PIK3CA* exons
