# Supplementary material for: Molecular profiling of single circulating tumor cells with diagnostic intention
Source: PubMed Central journal article supplement (PMC4237466; doi:10.15252/emmm.201404033), 2014-10-30
Supplement: emmm0006-1371-sd13.pdf [file emmm0006-1371-sd13.pdf]

**Table S7. qPCR primers.**

| <b>Primer</b> |         | <b>Sequence</b>             | <b>Annealing temperature</b> |
|---------------|---------|-----------------------------|------------------------------|
| HER2-310      | forward | CTGAGGTGGGAGACTTGCT         | 64°C                         |
|               | reverse | ACTCGATGCTTGCTACTGCA        |                              |
| HER2-315      | forward | GACAAAATGTAGAGCCAGACCATTTGG | 64°C                         |
|               | reverse | GGATCAGCACTGTGAGATTC        |                              |
| HER2-E        | forward | TGGCACAGTGAAGCACGGGAAAG     | 66°C                         |
|               | reverse | GGCCCTCCTCCAAGCTTGATCCT     |                              |
| AGTR1         | forward | CAGGAGATGAGAGTTCCAGA        | 55°C                         |
|               | reverse | GTACCAGGTGCAAGTGTAGC        |                              |
| OPN1LW        | forward | CTGTGCTTACCAAAGGCTTC        | 60°C                         |
|               | reverse | GACTCTACCCAGGTTTCTAG        |                              |
| CACNA1D       | forward | GGTGGCTGTACGGGTATATT        | 55°C                         |
|               | reverse | CCTGTGAAGTTTCAGGCTGTC       |                              |
| GZMB          | forward | AGACTATGCACCTGCCTGGA        | 55°C                         |
|               | reverse | GCCTCCTGGTAAGTTTGCAG        |                              |
| RUFY2         | forward | GTTGAGGGCTTCATCAACACCCA     | 64°C                         |
|               | reverse | CAGCTAGGAACTCCAGGAATCA      |                              |
| SMYD1         | forward | GGGTGACCTGCTTGACAT          | 55°C                         |
|               | reverse | GGGTGACCTGCTTGACAT          |                              |
